# Supplementary material for: Floristic Composition, Vegetation Structure, and Regeneration Status of Abachew Abuye Monstery Forest in Jabihtenan District, West Gojjam Zone, Amhara Regional State, Northwestern Ethiopia
Source: Research Square preprint supplement (doi:10.21203/rs.3.rs-6633294/v1), 2025-06-19
Supplement: Supplementary file 1 [file 05e750d56a4c5de9eed07875.docx]

**Additional files**

**Sp1. List of plan species collected from Abachew Abuye monastery forest (T= Tree ,S= Shrub, L=Liana ,C=Climber, H= Hrebs).**

| No | Botanical/ Scientific Name | Local Name | Family Name | Habit |
| --- | --- | --- | --- | --- |
| 1 | *Acacia abyssinia* Hochst. ex Benth. | Bazra Girar | Fabaceae | T |
| 2 | *Acacia nilotica*a (L.) Wild. ex Del. | Cheba | Fabaceae | T |
| 3 | *Acacia senegal* (L.) Wild. | Chino | Fabaceae | T |
| 4 | *Acacia seyal* Del. | Nechgrar | Fabaceae | T |
| 5 | *Acanthus sennii* Chiov*.* | Kosheshlie | Acanthaceae | S |
| 6 | *Albizia gummifera* (J.F. Gmel.) C.A. Sm. | Sesa | Fabaceae | T |
| 7 | *Aloe adigratana* Reynolds | Eret | Aloaceae | H |
| 8 | *Aloe rugosifolia* Gilbert & Sebsebe | Algeti | Aloace | H |
| 9 | *Amaranthus graecizans* L. | Aluma | Amaranthaceae | S |
| 10 | *Asparagus africanus* Lam*.* | Yeset kest | Asparagaceae | C |
| 11 | *Begonia foliosa* Kunrh | Jer | Foliosa | S |
| 12 | *Bersama abyssinica* Fresen. | Azamira | Melianthaceae | T |
| 13 | *Bidens macroptera* (Sch. Bip. ex Chiov.) Mesfin | Adey abeba | Asteraceae | H |
| 14 | *Bridelia micrantha* (Hochst.) Baill. | Yenebr tifr | Euphorbiaceae | S |
| 15 | *Calpurnia aurea* (Ait.)Benth. | Digita | Fabaceae | S |
| 16 | *Capparis tomentosa* Lam. | Gemero | Capparidaceae | C |
| 17 | *Carissa spinarum* L. | Agam | Apocynaceae | C |
| 18 | *Celtis africana*  Burm. f. | Yeberie kizen | Ulmaceae | T |
| 19 | *Cissus quadrangularis* L. | Alemudegen | Vitaceae | C |
| *20* | *Clausena anisata (Willd.) Benth.* | Limich | Clausena | *S* |
| 21 | Clematis simensis Fresen. | Azo hareg | Ranunculaceae | C |
| 22 | *Combertum molle*  R. Br. Ex G. Don | Mizan Kokor | Comberetaceaae | T |
| 23 | *Combretum*  *collinum* Fresen. | Zegedom | Combretaceae | T |
| 24 | *Combretum collinum* Fresen. | Genber | Combretaceae | T |
| 25 | *Commiphora africana* (A. Rich.) Engl. | Anqua; | Burseraceae | T |
| 26 | *Cordia africana* Lam. | Wanza | Boraginaceae | T |
| 27 | *Crinum abyssinicum* Hochst. ex A. Rich. | Yejb Shnkurt | Amaryllidaceous | H |
| 28 | *Croton macrostachyus* Del. | Bisana | Euphorbiaceae | T |
| 29 | *Cutia abyssinica* Jaub. & Spach. | Demasie | Biaceae | S |
| 30 | *Cynodon dactylon* (L.) Pers. | Serdo | Poaceae | H |
| 31 | *Cynoglossum coeruleum* Hochst. ex A.DC | Shingug | Boraginaceae | H |
| 32 | *Dichrostachys cinerea* (L.) Wight & Arn. | Ader | Fabaceae | S |
| 33 | *Dombeya quinqueseta* (Del.) Exell. | Shek shek | Sterculiaceae | S |
| 34 | *Dracaena steudneri* Engler | Itsepatos | Dracaenaceae | S |
| 35 | *Ensete ventricosum* (Welw.) Cheesman | Enset,/Kuba | Musaceae | S |
| 36 | *Erucastrum pachypodum* (Chiov.) Jonsell | Yewef gomen | Brassicaceae | H |
| 37 | *Eucalyptus camaldulensis* Dehnh. | Key biharzaf | Myrtaceae | T |
| 38 | *Eugenia uniflora* L. | Cherry | Myrtaceae | S |
| 39 | *Euphorbia abyssinica* Gmel | Kulkual | Euphorbiaceae | T |
| 40 | *Ficus carica* L. | Beles | Moraceae | S |
| 41 | *Ficus sur* Forssk. | Abar(Sholla) | Moraceae | T |
| 42 | *Ficus vasta* Forssk. | Warka | Moraceae | T |
| 43 | *Flacourtia indica* (Burm.f.) Merr. | Ankuka | Flacourtiaceae | T/S |
| 44 | *Ficus thonningii* Blume | Chibha | Moraceae | T |
| 45 | *Galium simense* Fresen. | Asheket | Rubiaceae | H |
| 46 | *Gardenia ternifolia*a Schumach. & Thonn. | Gambillo | Rubiaceae | T |
| 47 | *Girardinia diversifolia*(Link) Friis | Kusha | Uricaceae | H |
| 48 | *Grewia bicolour* Juss. | Somaya/Sefa | Tiliaceae | S/T |
| 49 | *Grewia mollis* A. Juss. | Betre muse | Tiliaceae | T/S |
| 50 | *Grewia villosa* Willd. | Lenquata | Tiliaceae | S |
| 51 | *Huperzia dacrydioides* (Baker) Pic.Serm. | Fern | Lycopodiaceae | H |
| 52 | *Jasminum abyssinicum* Haeml. ex DC. | Tero hareg | Oleaceae | Liana |
| 53 | *Justicia schimperiana*  (Hochst. ex Nees) | Simiza | Acanthaceae | S |
| 54 | *Maytenus arbutifolia* (A. Rich.) Wilczek. | Atat | Celastraceae | S/T |
| 55 | *Maytenus obscura* (A. Rich.) Cuf. | Koba | Celastraceae | T |
| 56 | *Millettia ferruginea* (Hoehst.) Bak. | Birbira | Fabaceae | T |
| 57 | *Mimusops kummel* A. DC. | Shiye | Sapotaceae | T |
| 58 | *Ocimum lamiifolium* Hochst. ex Benth. | Dama kase | Lamiaceae | S |
| 59 | *Olea capensis* L. | Bilch | Oleaceae | T |
| 60 | *Oplismenus hirtellus* (L.) P. Beauv. | Yekok sar | Poaceae | H |
| 61 | *Oxalis corniculata*a L. | Wajima/Maget | Oxalidaceae | H |
| 62 | *Parthenium hysterophorus* L. | Kinche arem | Asteraceae | H |
| 63 | *Pavetta abyssinica* Fresen. | Dengay seber | Rubiaceae | S/T |
| 64 | *Pavetta oliveriana* Hiern | Yetota kolet | Rubiaceae | S/T |
| 65 | *Peucedanum winkleri* Wolff | Kareshimbo | Apiaceae | H |
| 66 | *Phoenix reclinata* Jacq. | Senel/ Zenbaba; | Arecaceae | T |
| 67 | *Phytolacca dodecandra* L ·Herit. | Endod | Phytolaccaceae | L |
| 68 | *Piliostigma thonningii* (Schumach.) Milne-Redh. | Korench | Fabaceae | T |
| 69 | *Premna schimperi* Engl. | Checho | Premna | S |
| 70 | *Prunus africana* a (Hook. f.) Kalkm. | Tiqur Inchet | Rosaceae | T |
| 71 | *Pterolobium stellatum*  (Forssk.) Brenan | Kentafa | Fabaceae | C |
| 72 | *Rhus glutinosa* A. Rich. | Kamo | Anacardiaceae | S/T |
| 73 | *Rhus vulgaris* Meikle*.* | Ashkamo | Anardiaceae | T |
| 74 | *Ricinus communis* L. | Kachima | Euphorbiaceae | H |
| 75 | *Scadoxus multiflorus*  (Martyn) Raf. | Yejib ageda | Amaryllidaceae | H |
| 76 | *Senna singueana*a (Del.) Lock | Gufa | Fabaceae | S/T |
| 77 | *Solanum marginatum* L.f. | Zerchew | Solanaceae | S |
| 78 | *Stephania abyssinica* (Dillon & A*.* Rich.) Walp. | Ayit areg | Menispermaceae | H |
| 79 | *Stereospermum kunthianum* Cham. | Zana | Bignoniaceae | T |
| 80 | *Syzygium guineense*  (Wil/d.) DC. subsp. guineense | Dokima | Myrtaceae | T |
| 81 | *Tamarindus indica* L. | Amedelash/Roka | Fabaceae | T |
| 82 | *Terminalia schimperiana* Hochst. | Tege | Combretae | T |
| 83 | *Urera hypselodendron*  (A. Rich.) Wedd. | Lankuso | Urticaceae | C |
| 84 | *Vepris dainellii* (Pic.Serm.) Kokwtuo | Silla | Rutaceae | S/T |
| 85 | *Vernonia amygdalina* Del. | Girawa | Asteraceae | S/T |
| 86 | *Vernonia auriculifera* Hiern | Degerita | Asteraceae | S |
| 87 | *Ximenia americana* L. | Hol ( Enkuay) | Olacaceae | S/T |
| 88 | *Ziziphus spina-*christi (L.) Desf. | Kirkira | Rhamnaceae | S/T |

**Sp2. Abachew Monastery forest environmental factors Altitude, %MC = percentage of moisture contents, %OM= percentage of soil organic matter contents, pH= soil acidity and alkalinity.**

| **Sample**  **Plot** | Altitudes  in m | **pH** | **%MC** | **%OM** | **EC** | **%sand** | **%Clay** | **%Silt** | **Textural class** |
| --- | --- | --- | --- | --- | --- | --- | --- | --- | --- |
| 1 | 1618 | 6.12 | 2.59 | 1.8 | 258 | 58 | 14 | 28 | Loam |
| 2 | 1635 | 5.79 | 2.56 | 1.9 | 474 | 62 | 6 | 32 | sandy Loam |
| 3 | 1642 | 6.10 | 2.97 | 1.8 | 142 | 64 | 4 | 32 | sandy Loam |
| 4 | 1669 | 5.64 | 2.94 | 1.9 | 178 | 66 | 2 | 32 | sandy Loam |
| 5 | 1664 | 5.83 | 2.89 | 0.7 | 305 | 32 | 4 | 64 | Silt Loam |
| 6 | 1689 | 5.7 | 3.35 | 0.7 | 552 | 34 | 8 | 58 | Silt Loam |
| 7 | 1723 | 6.14 | 3.28 | 0.7 | 440 | 36 | 10 | 54 | Silt Loam |
| 8 | 1651 | 5.84 | 3.53 | 0.95 | 305 | 40 | 8 | 52 | Loam |
| 9 | 1632 | 5.66 | 3.75 | 1.2 | 400 | 44 | 7 | 49 | Loam |
| 10 | 1695 | 5.91 | 3.73 | 1 | 496 | 46 | 7 | 47 | Loam |
| 11 | 1691 | 5.84 | 4.17 | 1.2 | 305 | 30 | 6 | 64 | Silt Loam |
| 12 | 1628 | 5.62 | 4.15 | 1.7 | 552 | 54 | 6 | 40 | sandy Loam |
| 13 | 1703 | 5.68 | 4.18 | 1.3 | 552 | 56 | 4 | 40 | sandy Loam |
| 14 | 1677 | 5.96 | 3.35 | 1.8 | 480 | 31 | 5 | 64 | Silt Loam |
| 15 | 1695 | 5.96 | 3.89 | 1.7 | 496 | 54 | 4 | 42 | SandyLoam |
| 16 | 1711 | 6.02 | 4.3 | 2.25 | 496 | 51 | 6 | 48 | sandy Loam |
| 17 | 1577 | 6.30 | 2.53 | 2.4 | 655 | 52 | 4 | 44 | sandy Loam |
| 18 | 1621 | 6.23 | 3.63 | 1.7 | 440 | 50 | 8 | 42 | Loam |
| 19 | 1652 | 6.27 | 4.42 | 2.4 | 527 | 54 | 5 | 41 | sandy Loam |
| 20 | 1675 | 6.35 | 4.42 | 3.2 | 305 | 42 | 2 | 56 | Silt Loam |
| 21 | 1700 | 6.46 | 4.21 | 2.4 | 305 | 40 | 4 | 56 | Silt Loam |
| 22 | 1709 | 6.43 | 3.84 | 2.2 | 440 | 52 | 4 | 44 | sandy Loam |
| 23 | 1723 | 6.24 | 4.94 | 2.05 | 587 | 44 | 5 | 51 | Silt Loam |
| 24 | 1648 | 5.98 | 3.94 | 1.85 | 587 | 41 | 4 | 55 | Silt Loam |
| 25 | 1686 | 5.3 | 4.08 | 2.1 | 420 | 45 | 5 | 50 | Silt Loam |
| 26 | 1665 | 5.8 | 3.38 | 1.4 | 313 | 43 | 5 | 52 | Silt Loam |
| 27 | 1647 | 6.2 | 3.89 | 2.2 | 496 | 44 | 3 | 53 | Silt Loam |
| 28 | 1714 | 5.99 | 3.64 | 2.15 | 372 | 45 | 4 | 51 | Silt Loam |
| 29 | 1739 | 6.25 | 4.3 | 2.35 | 373 | 40 | 4 | 56 | Silt Loam |
| 30 | 1686 | 6.33 | 5.58 | 2.4 | 622 | 46 | 4 | 50 | Silt Loam |
| 31 | 1694 | 6.13 | 5.35 | 2.4 | 622 | 42 | 4 | 54 | sandy Loam |
| 32 | 1730 | 4.98 | 4.52 | 1.8 | 186 | 40 | 26 | 34 | Loam |
| 33 | 1688 | 6.2 | 3.965 | 1.75 | 404 | 42 | 4 | 54 | Silt Loam |
| 34 | 1689 | 6.09 | 4.35 | 1.8 | 587 | 38 | 5 | 57 | Silt Loam |
| 35 | 1722 | 5.25 | 3.79 | 1.85 | 313 | 41 | 15 | 44 | Loam |
| 36 | 1682 | 6.02 | 2.35 | 1.1 | 186 | 38 | 4 | 58 | Silt Loam |
| 37 | 1714 | 6.05 | 3.35 | 1.2 | 552 | 34 | 4 | 62 | Silt Loam |
| 38 | 1731 | 5.51 | 3.06 | 1.9 | 440 | 42 | 4 | 54 | Silt Loam |
| 39 | 1700 | 5.65 | 3.56 | 1.8 | 246 | 44 | 4 | 52 | Silt Loam |
| 40 | 1732 | 5.94 | 5.08 | 1.7 | 496 | 35 | 3 | 62 | Silt  Loam |
| 41 | 1734 | 5.83 | 3.155 | 2.1 | 536 | 37 | 4 | 59 | Silt  Loam |
| 42 | 1705 | 6.07 | 4.76 | 2.5 | 305 | 50 | 4 | 46 | sandy Loam |
| 43 | 1708 | 5.86 | 6.81 | 2.2 | 440 | 36 | 2 | 62 | Silt Loam |
| 44 | 1722 | 5.60 | 3.25 | 2.3 | 632 | 32 | 4 | 64 | Silt Loam |
| 45 | 1702 | 5.85 | 3.27 | 2.8 | 622 | 28 | 2 | 70 | Silt Loam |
| 46 | 1710 | 5.64 | 5.16 | 2.65 | 531 | 42 | 4 | 54 | silt Loam |
| 47 | 1699 | 5.7 | 5.04 | 2.1 | 382 | 34 | 4 | 62 | silt Loam |
| 48 | 1700 | 5.83 | 4.1 | 2.4 | 404 | 34 | 3 | 63 | silt Loam |
| 49 | 1714 | 5.41 | 5.56 | 2 | 132 | 36 | 2 | 62 | Silt Loam |
| 50 | 1725 | 5.60 | 4.42 | 2.3 | 267 | 35 | 4 | 61 | silt Loam |
| 51 | 1727 | 5.80 | 3.27 | 2.5 | 186 | 32 | 14 | 64 | Silt Loam |
| 52 | 1732 | 5.70 | 3,45 | 2.4 | 146 | 30 | 6 | 64 | silt Loam |
